# Supplementary material for: Dicopper(ii) complexes of a new pyrazolate-containing Schiff-base macrocycle and related acyclic ligand
Source: Royal Society of Chemistry journal article supplement (doi:10.1039/b614637f), 2006-12-12
Supplement: b614637f.pdf [file b614637f.pdf]

## Electronic Supplementary Information

### Dicopper(II) complexes of a new pyrazolate-containing Schiff-base macrocycle and related acyclic ligand

Duncan J. de Geest, Andy Noble, Boujemaa Moubaraki, Keith S. Murray, David S. Larsen and Sally Brooker

**Table S1.** Table of selected angles [°] for the four crystallographically characterised dicopper(II) complexes.

| [Cu <sub>2</sub> (L1)(OAc) <sub>2</sub> ]·2MeOH·H <sub>2</sub> O |            | [Cu <sub>2</sub> (L1)(NCS) <sub>2</sub> ]DMF |            | [Cu <sub>2</sub> (L2)(H <sub>2</sub> O) <sub>2</sub> (OAc) <sub>3</sub> ] |            | [Cu <sub>2</sub> (L2)(NCS) <sub>2</sub> (DMF)]BF <sub>4</sub> |            |
|------------------------------------------------------------------|------------|----------------------------------------------|------------|---------------------------------------------------------------------------|------------|---------------------------------------------------------------|------------|
| N(1)-Cu(1)-N(3)                                                  | 80.21(17)  | N(1)-Cu(1)-N(3)                              | 80.28(19)  | N(1)-Cu(1)-N(3)                                                           | 79.77(8)   | N(1)-Cu(1)-N(3)                                               | 81.8(2)    |
| N(1)-Cu(1)-N(4)                                                  | 152.73(16) | N(1)-Cu(1)-N(4)                              | 153.57(18) | N(1)-Cu(1)-N(4)                                                           | 171.48(8)  | N(2)-Cu(2)-N(6)                                               | 169.5(2)   |
| N(1)-Cu(1)-O(30)                                                 | 92.49(15)  | N(1)-Cu(1)-N(5)                              | 93.21(18)  | N(1)-Cu(1)-O(30)                                                          | 91.82(7)   | N(2)-Cu(2)-O(70)                                              | 95.84(19)  |
| N(2)-Cu(2)-N(7)                                                  | 153.29(15) | N(1)-Cu(1)-N(50)                             | 110.82(18) | N(1)-Cu(1)-O(40)                                                          | 94.04(7)   | N(4)-Cu(1)-N(1)                                               | 155.5(2)   |
| N(2)-Cu(2)-N(8)                                                  | 80.28(16)  | N(2)-Cu(2)-N(6)                              | 92.53(18)  | N(2)-Cu(2)-N(6)                                                           | 171.65(8)  | N(4)-Cu(1)-N(3)                                               | 91.5(2)    |
| N(2)-Cu(2)-O(40)                                                 | 102.68(14) | N(2)-Cu(2)-N(7)                              | 151.29(18) | N(2)-Cu(2)-O(60)                                                          | 89.97(7)   | N(5)-Cu(2)-N(2)                                               | 81.4(2)    |
| N(3)-Cu(1)-N(4)                                                  | 93.98(18)  | N(2)-Cu(2)-N(8)                              | 79.89(19)  | N(2)-Cu(2)-O(70)                                                          | 92.15(7)   | N(5)-Cu(2)-N(6)                                               | 89.7(2)    |
| N(3)-Cu(1)-O(30)                                                 | 98.86(15)  | N(2)-Cu(2)-N(60)                             | 113.25(18) | N(3)-Cu(1)-N(4)                                                           | 92.85(8)   | N(5)-Cu(2)-O(70)                                              | 89.2(2)    |
| N(4)-Cu(1)-O(30)                                                 | 114.76(16) | N(3)-Cu(1)-N(50)                             | 92.87(18)  | N(3)-Cu(1)-O(30)                                                          | 134.79(7)  | N(6)-Cu(2)-O(70)                                              | 89.63(19)  |
| N(5)-Cu(1)-N(1)                                                  | 93.15(16)  | N(4)-Cu(1)-N(3)                              | 93.3(2)    | N(3)-Cu(1)-O(40)                                                          | 129.01(7)  | N(50)-Cu(1)-N(1)                                              | 99.5(2)    |
| N(5)-Cu(1)-N(3)                                                  | 153.07(16) | N(4)-Cu(1)-N(50)                             | 95.00(18)  | N(4)-Cu(1)-O(30)                                                          | 90.38(7)   | N(50)-Cu(1)-N(3)                                              | 166.3(2)   |
| N(5)-Cu(1)-N(4)                                                  | 79.98(16)  | N(5)-Cu(1)-N(3)                              | 152.67(19) | N(4)-Cu(1)-O(40)                                                          | 93.93(7)   | N(50)-Cu(1)-N(4)                                              | 92.6(2)    |
| N(5)-Cu(1)-O(30)                                                 | 107.53(14) | N(5)-Cu(1)-N(4)                              | 80.79(19)  | N(5)-Cu(2)-N(2)                                                           | 80.10(8)   | N(60)-Cu(2)-N(2)                                              | 94.2(2)    |
| N(6)-Cu(2)-N(2)                                                  | 92.64(16)  | N(5)-Cu(1)-N(50)                             | 114.14(18) | N(5)-Cu(2)-N(6)                                                           | 92.22(8)   | N(60)-Cu(2)-N(5)                                              | 169.8(2)   |
| N(6)-Cu(2)-N(7)                                                  | 80.90(16)  | N(6)-Cu(2)-N(7)                              | 80.01(19)  | N(5)-Cu(2)-O(60)                                                          | 107.87(7)  | N(60)-Cu(2)-N(6)                                              | 93.6(2)    |
| N(6)-Cu(2)-N(8)                                                  | 153.59(15) | N(6)-Cu(2)-N(8)                              | 151.83(18) | N(5)-Cu(2)-O(70)                                                          | 81.83(7)   | N(60)-Cu(2)-O(70)                                             | 100.4(2)   |
| N(6)-Cu(2)-O(40)                                                 | 95.43(14)  | N(6)-Cu(2)-N(60)                             | 108.51(19) | N(6)-Cu(2)-O(60)                                                          | 89.27(7)   | Cu(1)-N(1)-N(2)                                               | 136.84(15) |
| N(7)-Cu(2)-N(8)                                                  | 94.02(17)  | N(7)-Cu(2)-N(8)                              | 93.64(19)  | N(6)-Cu(2)-O(70)                                                          | 89.99(7)   | Cu(2)-N(2)-N(1)                                               | 139.38(15) |
| N(7)-Cu(2)-O(40)                                                 | 103.71(14) | Cu(1)-N(1)-N(2)                              | 132.92(34) | O(30)-Cu(1)-O(40)                                                         | 95.64(6)   |                                                               |            |
| N(8)-Cu(2)-O(40)                                                 | 110.92(14) | Cu(1)-N(5)-N(6)                              | 132.89(35) | O(50)-Cu(2)-N(2)                                                          | 97.43(7)   |                                                               |            |
| Cu(1)-N(1)-N(2)                                                  | 133.04(29) | Cu(2)-N(1)-N(2)                              | 132.93(34) | O(50)-Cu(2)-N(5)                                                          | 163.81(7)  |                                                               |            |
| Cu(1)-N(5)-N(6)                                                  | 132.38(29) | Cu(2)-N(5)-N(6)                              | 133.18(34) | O(50)-Cu(2)-N(6)                                                          | 90.86(7)   |                                                               |            |
| Cu(2)-N(1)-N(2)                                                  | 133.23(29) |                                              |            | O(50)-Cu(2)-O(60)                                                         | 88.05(7)   |                                                               |            |
| Cu(2)-N(5)-N(6)                                                  | 134.10(29) |                                              |            | O(50)-Cu(2)-O(70)                                                         | 82.28(6)   |                                                               |            |
|                                                                  |            |                                              |            | O(60)-Cu(2)-O(70)                                                         | 170.29(6)  |                                                               |            |
|                                                                  |            |                                              |            | Cu(1)-N(1)-N(2)                                                           | 140.95(36) |                                                               |            |
|                                                                  |            |                                              |            | Cu(2)-N(2)-N(1)                                                           | 138.00(38) |                                                               |            |

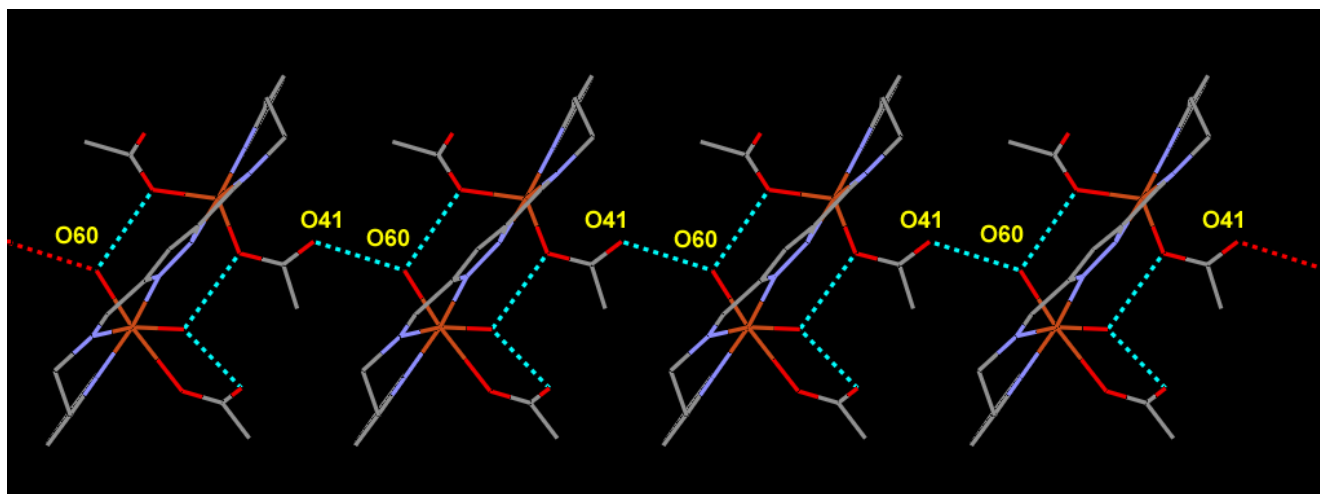

Figure S1 Inter- and intramolecular hydrogen bonding framework for the crystal structure of the complex  $[\text{Cu}^{\text{II}}_2(\text{L}2)(\text{H}_2\text{O})_2(\text{OAc})_3]$ .

770

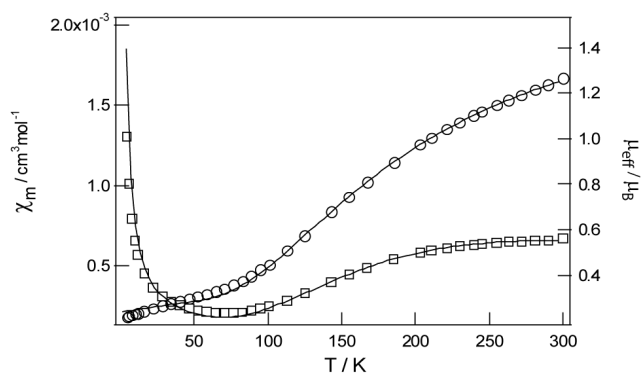

Figure S2. Thermal variation of  $\mu_{\text{eff}}$  ( $\circ\circ$ ) and  $\chi_m$  ( $\square\square$ ) for  $[\text{Cu}_2(\text{L}1)(\text{OAc})_2] \cdot 2\text{H}_2\text{O}$ . The solid lines represent the best fits and the parameters given in the text.
